# Supplementary material
Source: PubMed Central journal article supplement (PMC11028110)
Supplement: 262_2018_2211_MOESM1_ESM.pdf [file 262_2018_2211_MOESM1_ESM.pdf]

## Supplementary data

**Supplementary Table 1. Flow cytometry antibodies**

| Name                                 | Fluorophore | Clone    | Company            | Panel used                                       |
|--------------------------------------|-------------|----------|--------------------|--------------------------------------------------|
| <b>Anti-CCR7</b>                     | APC         | REA108   | Miltenyi, Germany  | Differentiation                                  |
| <b>Anti-CD45RA</b>                   | PE          | HI100    | BD Biosciences, UK |                                                  |
| <b>Anti-CD45RO</b>                   | PE          | UCHL1    |                    |                                                  |
| <b>Anti-CD28</b>                     | PE          | CD28.2   |                    |                                                  |
| <b>Anti-CD27</b>                     | PE          | M-T271   |                    |                                                  |
| <b>Anti-CD25</b>                     | PE          | M-A251   |                    |                                                  |
| <b>Anti-CD8</b>                      | FITC        | HIT8A    |                    |                                                  |
| <b>Anti-CD62L</b>                    | Pe/Cy7      | DREG-56  | eBioscience, UK    | Activation, Treg, Exhaustion & Functional Panels |
| <b>Live/Dead</b>                     | BV395       | N/A      | Invitrogen         |                                                  |
| <b>Anti-CD4</b>                      | BV785       | OKT4     | Biolegend, UK      |                                                  |
| <b>Anti-CD14</b>                     | Pe-Cy7      | HCD14    |                    |                                                  |
| <b>Anti-CD20</b>                     | Pe-Cy7      | 2H7      |                    |                                                  |
| <b>Anti-CD56</b>                     | Pe-Cy7      | HCD56    |                    |                                                  |
| <b>Anti-CD45</b>                     | BV510       | UCHL1    |                    |                                                  |
| <b>Anti-CD3</b>                      | APC         | UCHT1    |                    |                                                  |
| <b>Anti-PD-1</b>                     | PE          | EH12.2H7 |                    |                                                  |
| <b>Anti-TIM3</b>                     | BV421       | F38-2E2  |                    |                                                  |
| <b>Anti-CD69</b>                     | BV421       | FN50     |                    |                                                  |
| <b>Anti-CD25</b>                     | BV711       | BC96     |                    |                                                  |
| <b>Anti-OX40</b>                     | FITC        | ACT35    |                    |                                                  |
| <b>Anti-Foxp3*</b>                   | PE          | 206D     |                    |                                                  |
| <b>Anti-CD127</b>                    | BV421       | A019D5   |                    |                                                  |
| <b>Anti- TNF<math>\alpha</math>*</b> | BV650       | MAb11    |                    |                                                  |
| <b>Anti- IFN<math>\gamma</math>*</b> | BV711       | 4S.B3    |                    |                                                  |
| <b>GranzymeB</b>                     | FITC        | GB11     |                    |                                                  |
| <b>Anti-ICOS</b>                     | BV650       | Dx29     | BD Biosciences, UK |                                                  |
| <b>Anti-CD8</b>                      | APC-H7      | SK1      |                    |                                                  |
| <b>Anti-IL2*</b>                     | BV421       | 5344.111 |                    |                                                  |
| <b>Anti-LAG3</b>                     | FITC        | 17B4     | Enzo Lifesciences  |                                                  |

\*Denotes intracellular antigens

**a**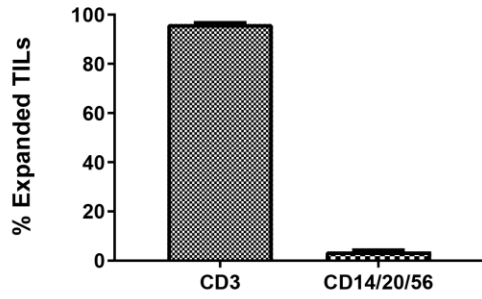**b**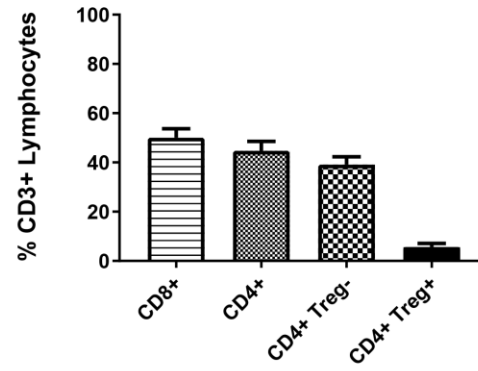

**Supplementary Figure 1. Phenotype of expanded ovarian TILs.** (a) Frequency of CD3<sup>+</sup> T cells and other lineages (CD14<sup>+</sup>/CD20<sup>+</sup>/CD56<sup>+</sup>) in the expanded TIL cultures. (b) Percentage CD8<sup>+</sup>, CD4<sup>+</sup> and Treg cells in the expanded TILs cultures. Data are reported as mean % ± SEM.

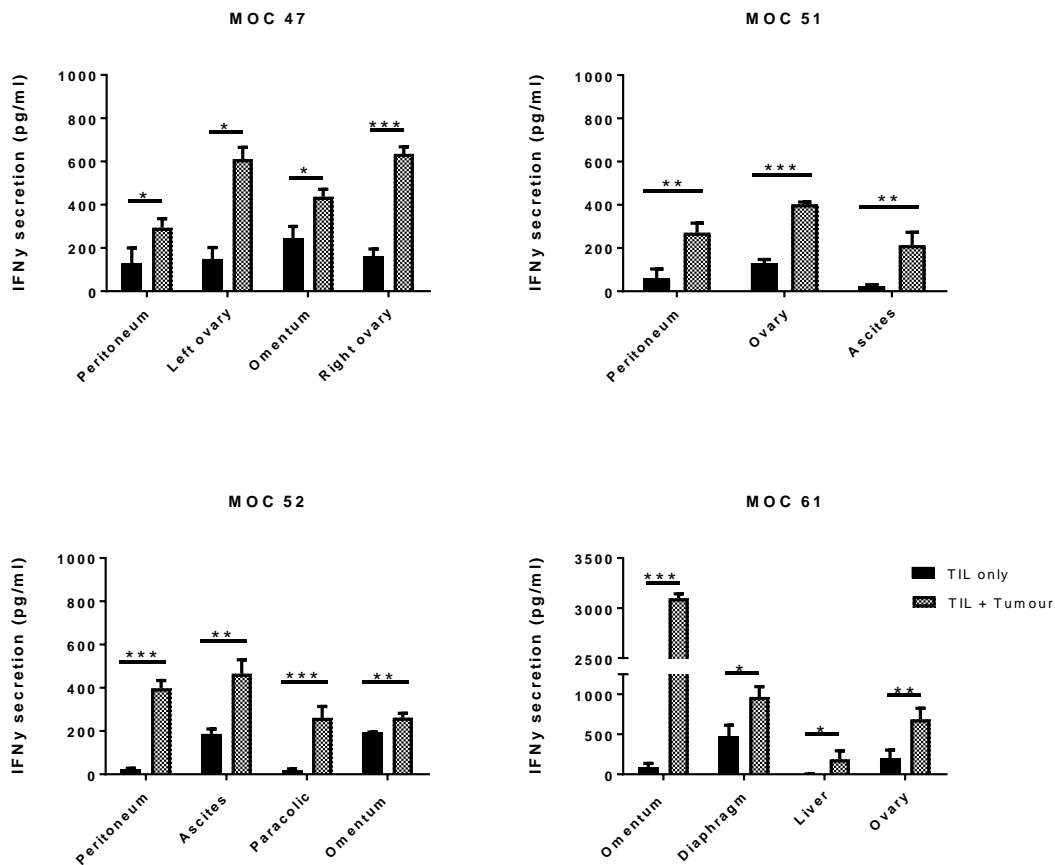

**Supplementary Figure 2. Comparison of functional activity of TILs expanded from different anatomical sites.** In four patients, TILs were successfully expanded from a minimum of three different anatomical sites. Expanded TILs were co-cultured against autologous tumour from cognate sites, to determine whether expanded TILs retained functional activity. TILs were considered to show functional activity if significantly higher levels of IFN $\gamma$  were produced by the co-culture compared to TILs alone. Mean and SD of three replicates are shown. \*P<0.05, \*\*P<0.01, \*\*\*P<0.001, paired student T-test.

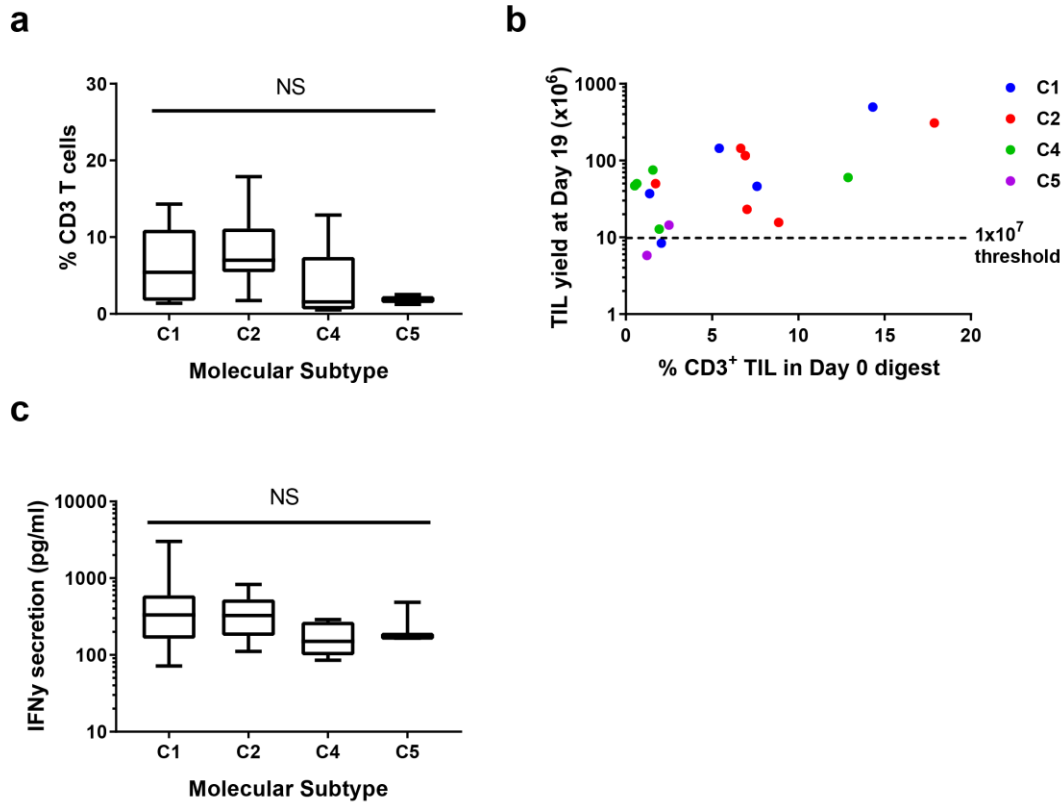

**Supplementary Figure 3. Comparison of CD3 T cell infiltration, expansion and IFN $\gamma$  secretion by the different molecular subtypes of ovarian cancer.** (a) Percentage of CD3<sup>+</sup> T cells in the tumour digest was determined using flow cytometry and compared between molecular subtypes of ovarian cancer (C1/mesenchymal; C2/immune; C4/differentiated; C5/proliferative). (b) Final TIL yield at day 19 compared against percentage of CD3<sup>+</sup> TIL in tumour digest. Dashed line illustrates  $1 \times 10^7$  threshold for a positive TIL culture. (c) IFN $\gamma$  produced by expanded TILs in response to autologous tumour cells was compared between molecular subtypes. Data represents the median, upper and lower quartiles and range. Kruskal-Wallis test;  $P < 0.05$ , NS, not significant.
